# Supplementary material
Source: Research Square preprint supplement (doi:10.21203/rs.3.rs-6862867/v1)
Supplement: Supplementary file 1 [file 4388fdb8a175346eec2c72eb.doc]

**eTable 1. Multivariate analysis assessing the effect of beta-blocker therapy on mortality rates.**

|  | **Effect of premorbid beta-blocker on**  **Mortality Rate, OR (95% CI)** | **P value** |
| --- | --- | --- |
| In-hospital mortalitya | 0.432 (0.283-0.658) | ＜0.001 |
| 7-day mortalityb | 0.615 (0.356-1.036) | 0.082 |
| 14-day mortalityc | 0.516 (0.323-0.824) | 0.006 |
| 28-day mortalityd | 0.432 (0.281-0.664) | ＜0.001 |

The multivariable model included variables with p < 0.05 in the univariate analysis:

apremorbid beta-blocker, sex, age, ALB, BNU, LAC, SOFA score, APACHE Ⅱ score.

bpremorbid beta-blocker, age, PLT, CRP, ALB, BNU, LAC, SOFA score, APACHE Ⅱ score.

cpremorbid beta-blocker, sex, age, PLT, ALB, BNU, LAC, SOFA score, APACHE Ⅱ score.

dpremorbid beta-blocker, sex, age, PLT, ALB, BNU, LAC, SOFA score, APACHE Ⅱ score.
